# Supplementary material for: Nanoceria–nanocellulose hybrid materials for delayed release of antibiotic and anti-inflammatory medicines
Source: Royal Society of Chemistry journal article supplement (doi:10.1039/d2ma00471b), 2022-01-01
Supplement: d2ma00471b1.pdf [file d2ma00471b1.pdf]

## Nanoceria-Nanocellulose Hybrid Materials for Delayed Release of Antibiotic and Anti-Inflammatory Medicines

Servane Gaio, Fredric G. Svensson, Troy C. Breijjaert, Gulaim A. Seisenbaeva, and Vadim G. Kessler\*

*Department of Molecular Sciences, Biocentrum, Swedish University of Agricultural Sciences, Almas Allé 5, SE-756 51 Uppsala, Sweden.*

### 1. SEM micrographs

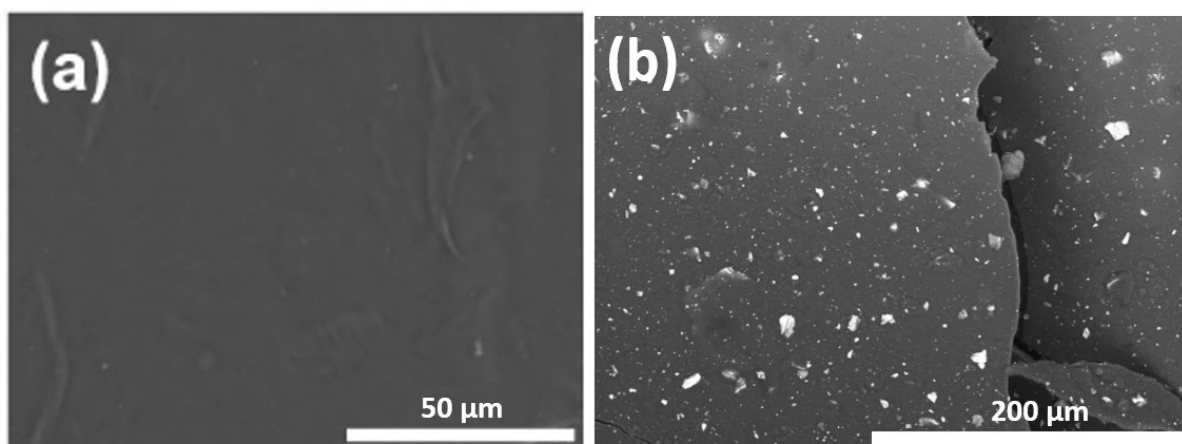

Supplementary Figure S1. SEM micrographs of (a) CNC/PEG and CNC/PEG\_CeO<sub>2</sub> with 50 w% ceria.

### 2. AFM micrographs

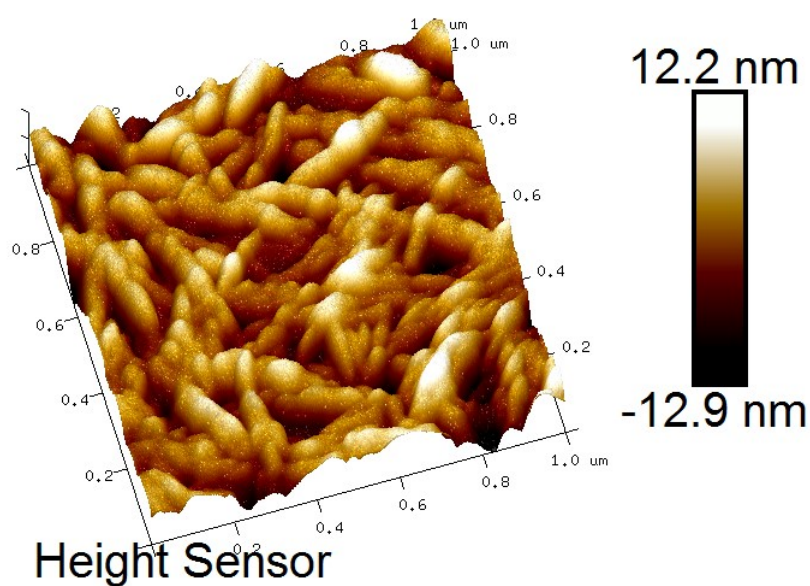

Supplementary Figure S2. 3D AFM micrograph of CNC.

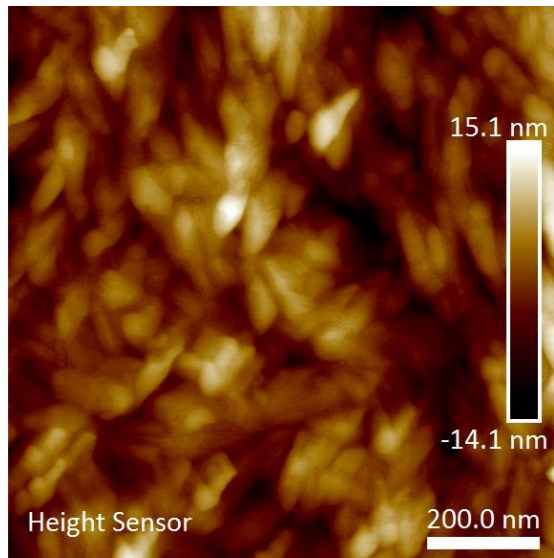

Supplementary Figure S3. AFM micrograph of CNC.

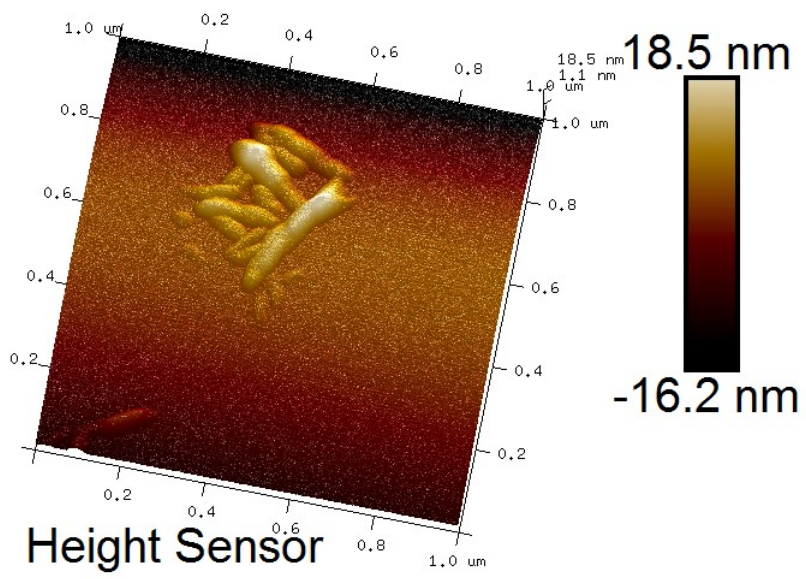

Supplementary Figure S4. AFM micrograph of CNC fibers.

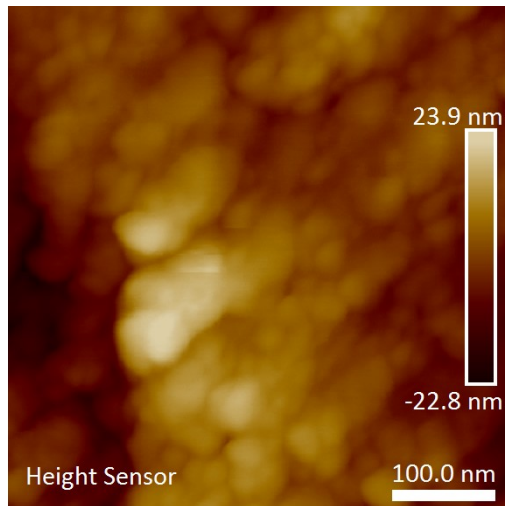

Supplementary Figure S5. AFM micrograph of low-temperature ceria (CeO<sub>2</sub>\_80).

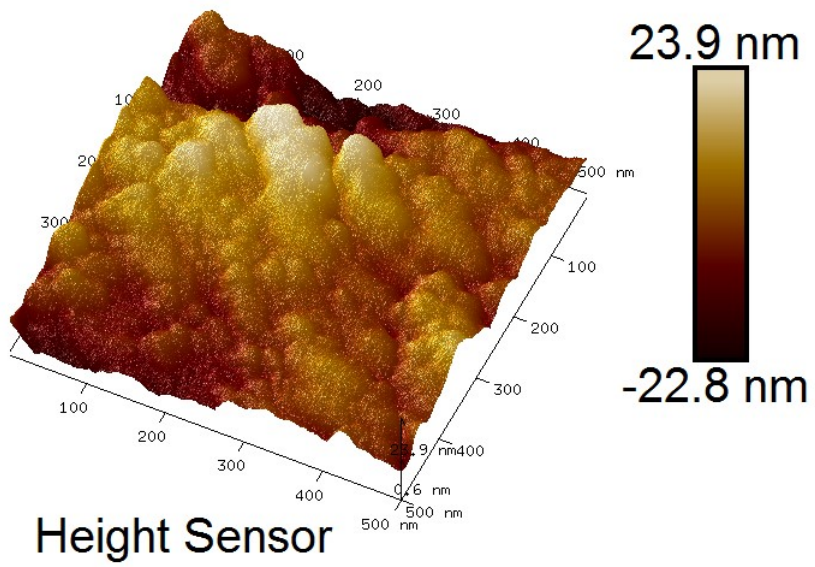

Supplementary Figure S6. 3D AFM micrograph of low-temperature ceria (CeO<sub>2</sub>\_80).

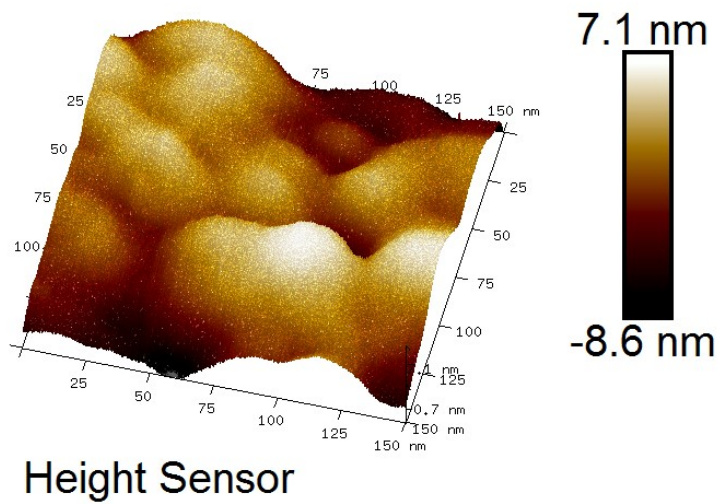

Supplementary Figure S7. 3D AFM micrograph of low-temperature ceria ( $\text{CeO}_2$ , 80), showing individual particles.

### 3. pH effect of Ampicillin

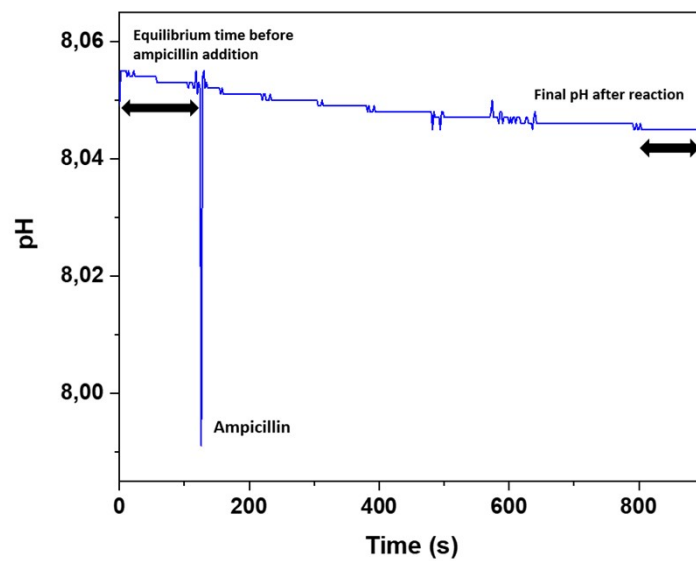

Supplementary Figure S8. pH-change after addition of ampicillin to the CNC reaction mixture in the final synthesis step of CNC/PEG/BTCA/ $\text{CeO}_2$ .

#### 4. Optical photos

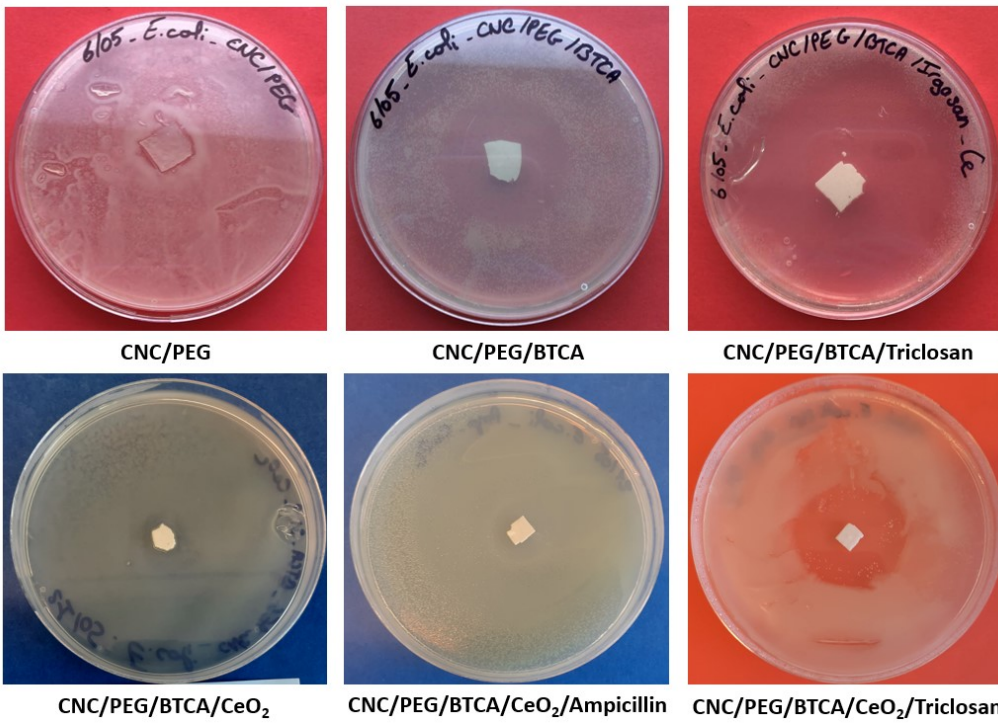

Supplementary Figure S9. The *E. coli* cultivations after growing 16 hours with the different hybrid materials.
